# Supplementary material for: Microfluidic synthesis of graphene oxide/MnO2-incorporated self-propelling micromotors for organic dye removal
Source: Royal Society of Chemistry journal article supplement (doi:10.1039/d2tc04394g), 2022-12-15
Supplement: d2tc04394g3.pdf [file d2tc04394g3.pdf]

## Electronic Supplementary Information

# Microfluidic synthesis of graphene oxide/MnO<sub>2</sub>-incorporated self-propelling micromotors for organic dye removal

Hoang Gia Vinh Ho<sup>a</sup> and Pil J. Yoo<sup>\*abcd</sup>

- 
- a. School of Chemical Engineering, Sungkyunkwan University (SKKU), Suwon 16419, Republic of Korea.  
E-mail: [pjyoo@skku.edu](mailto:pjyoo@skku.edu)*
- b. SKKU Advanced Institute of Nanoscience and Technology (SAINT), Sungkyunkwan University (SKKU), Suwon, 16419, Republic of Korea*
- c. SKKU Institute of Energy Science and Technology (SIEST), Sungkyunkwan University (SKKU), Suwon, 16419, Republic of Korea*
- d. KIST-SKKU Carbon-Neutral Research Center, Sungkyunkwan University (SKKU), Suwon 16419, Republic of Korea*

E-mail: [pjyoo@skku.edu](mailto:pjyoo@skku.edu)

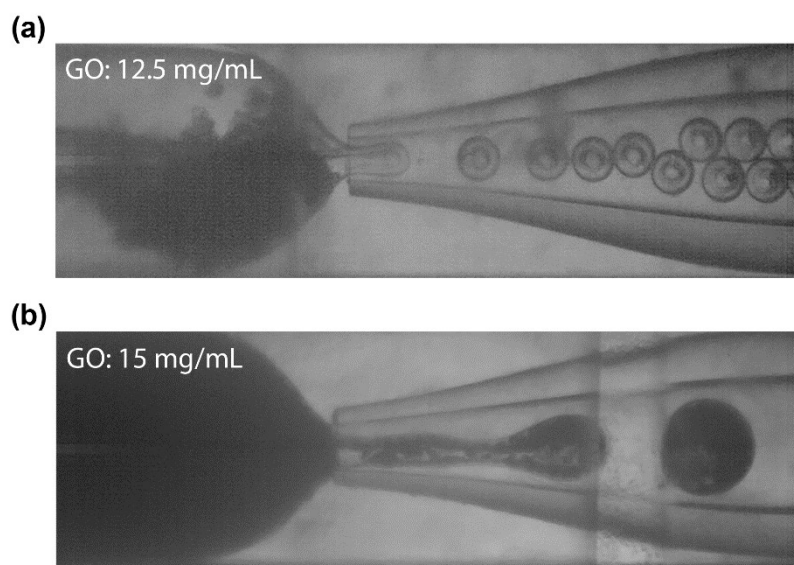

**Fig S1.** The micromotors fabrication regime with different GO concentration, (a) 12.5 mg/mL and (b) 15 mg/mL.

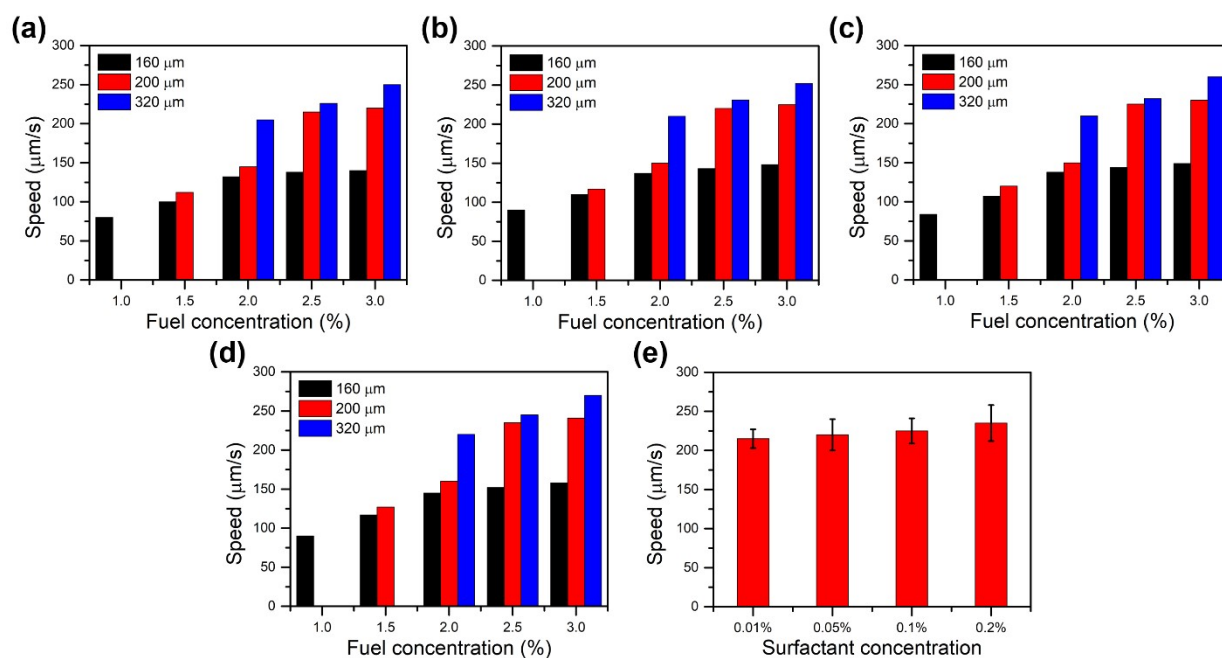

**Fig S2.** The effect of different surfactant concentration on the movement speed of the micromotors in varying fuel concentrations and sizes of the micromotor, the chosen surfactant concentration for examination were (a) 0.01 wt%, (b) 0.05 wt%, (c) 0.1 wt% and (d) 0.2 wt%. For each displayed value, five of the quickest-moving micromotors were chosen and analyzed. (e) The speed of 200 μm micromotors in 2.5 wt% fuel concentration with different surfactant concentration plotted against each other.

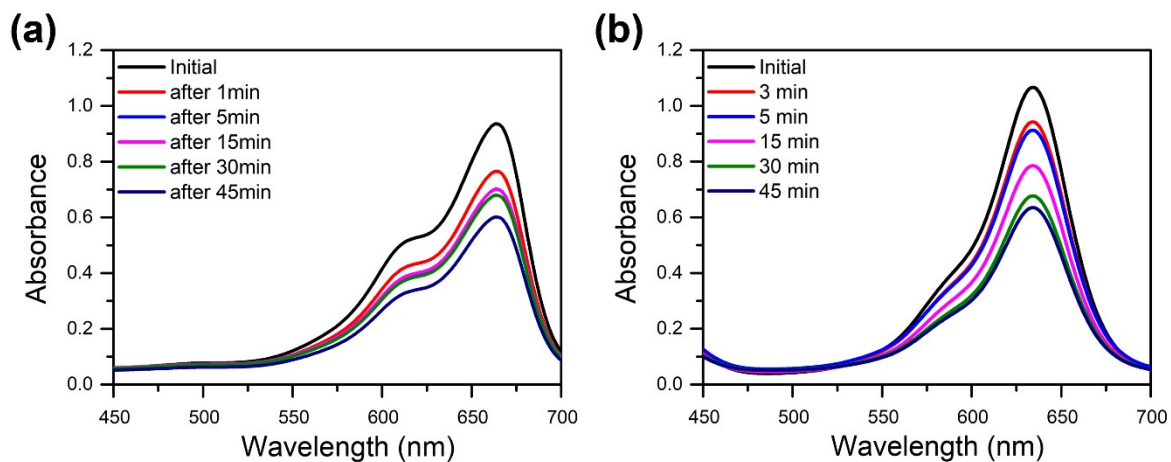

**Fig S3.** UV-Vis measurements of the adsorption process of (a) Methylene Blue and (b) Brilliant Green using non-catalyst GO-embedded stationary microbeads.

**Video S1.** Bubble propulsion of the micromotor in the fuel solution. The micromotor's size is 200  $\mu\text{m}$ , the fuel is 2.5 wt%  $\text{H}_2\text{O}_2$  solution with 0.1 wt% Triton X-100.

**Video S2.** The real time adsorption process of Methylene Blue by micromotors in wastewater solution. The wastewater is 5mg/l Methylene Blue in 2.5 wt%  $\text{H}_2\text{O}_2$  solution with 0.1 wt% Triton X-100.
